# Supplementary material for: Overexpression of SKA3 correlates with poor prognosis in female early breast cancer
Source: PeerJ journal article supplement (doi:10.7717/peerj.12506), 2021-12-13

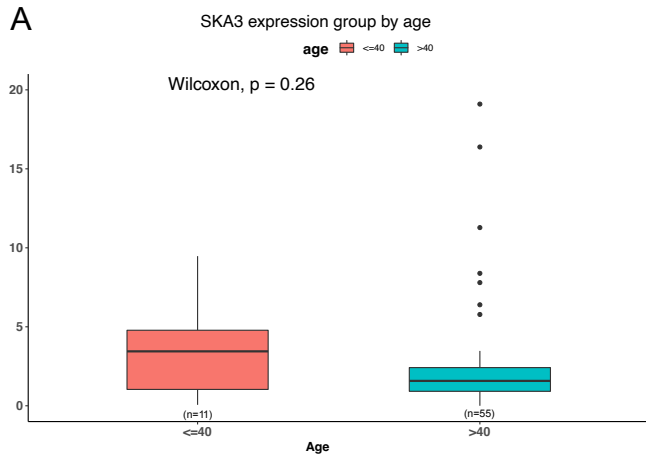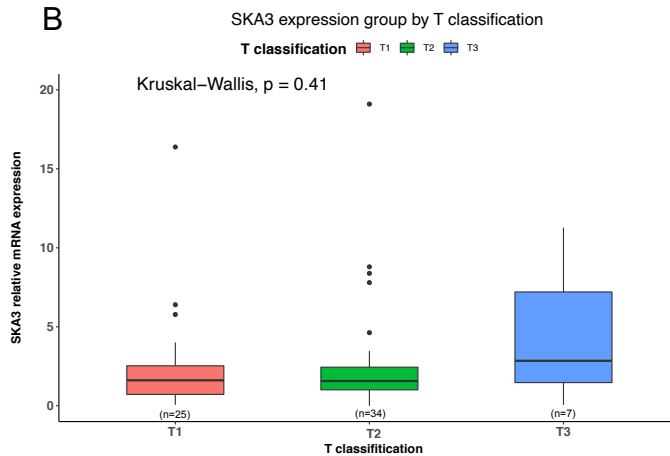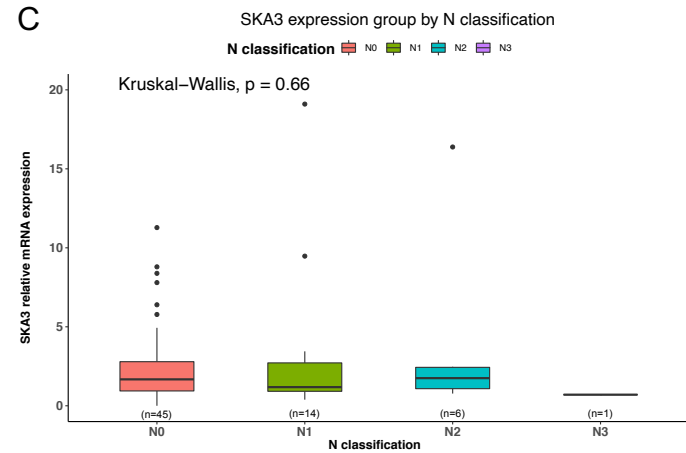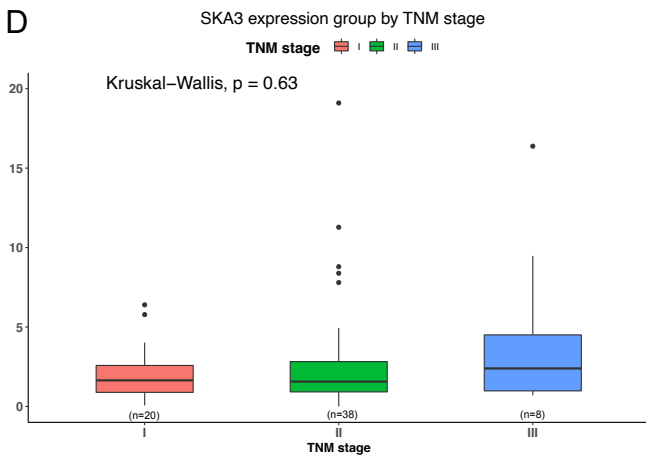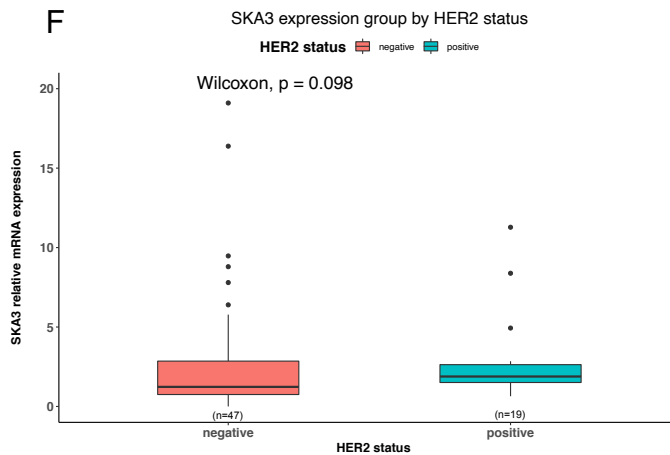

Supplement: supplement_Fig1.pdf [file supplement_Fig1.pdf]
